# Supplementary material for: Para-kin relationship between fans and idols: a qualitative analysis of fans’ motivations for purchasing idol-dolls
Source: publisher site journal article supplement (doi:10.1515/omgc-2023-0019), 2023-08-08

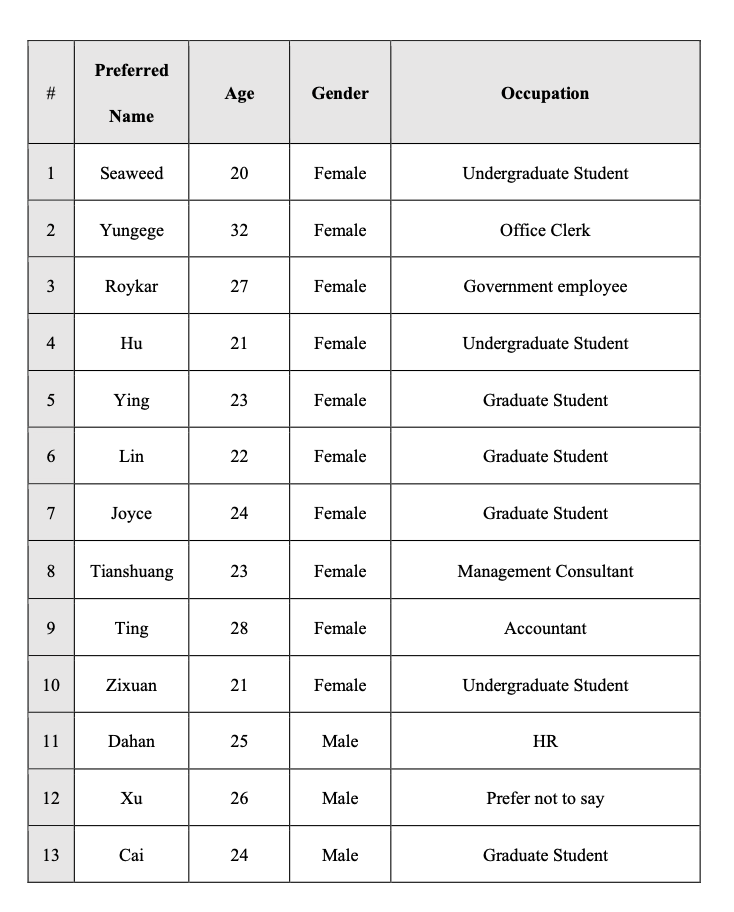
**Appendix A: Interviewees' Profiles**


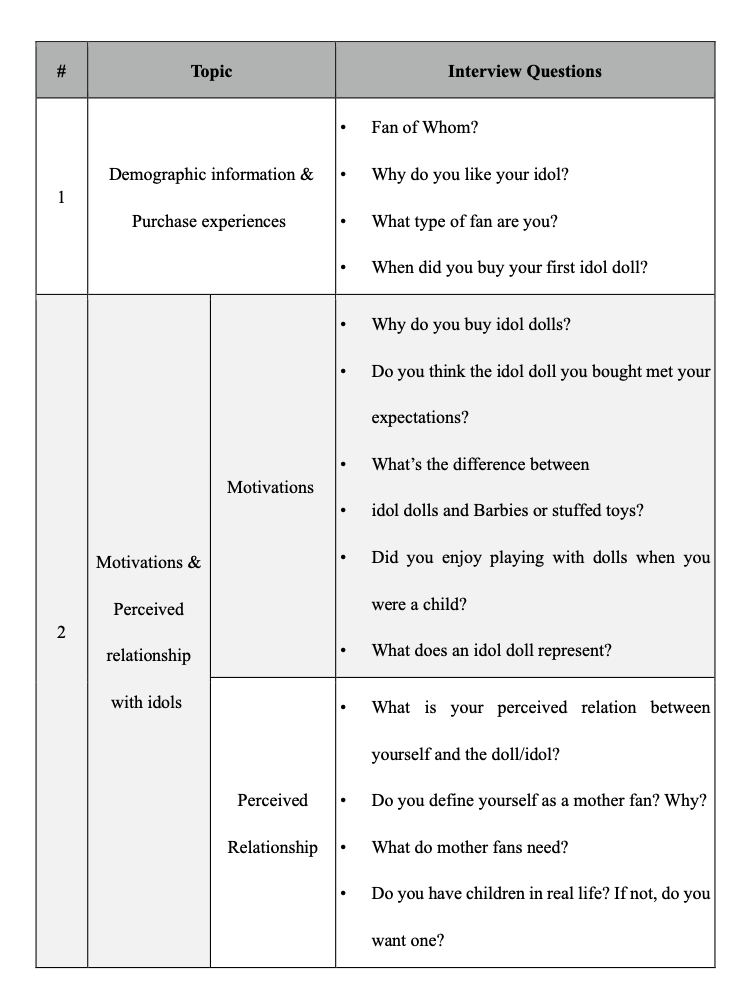
**Appendix B: Interview Topic Guide**


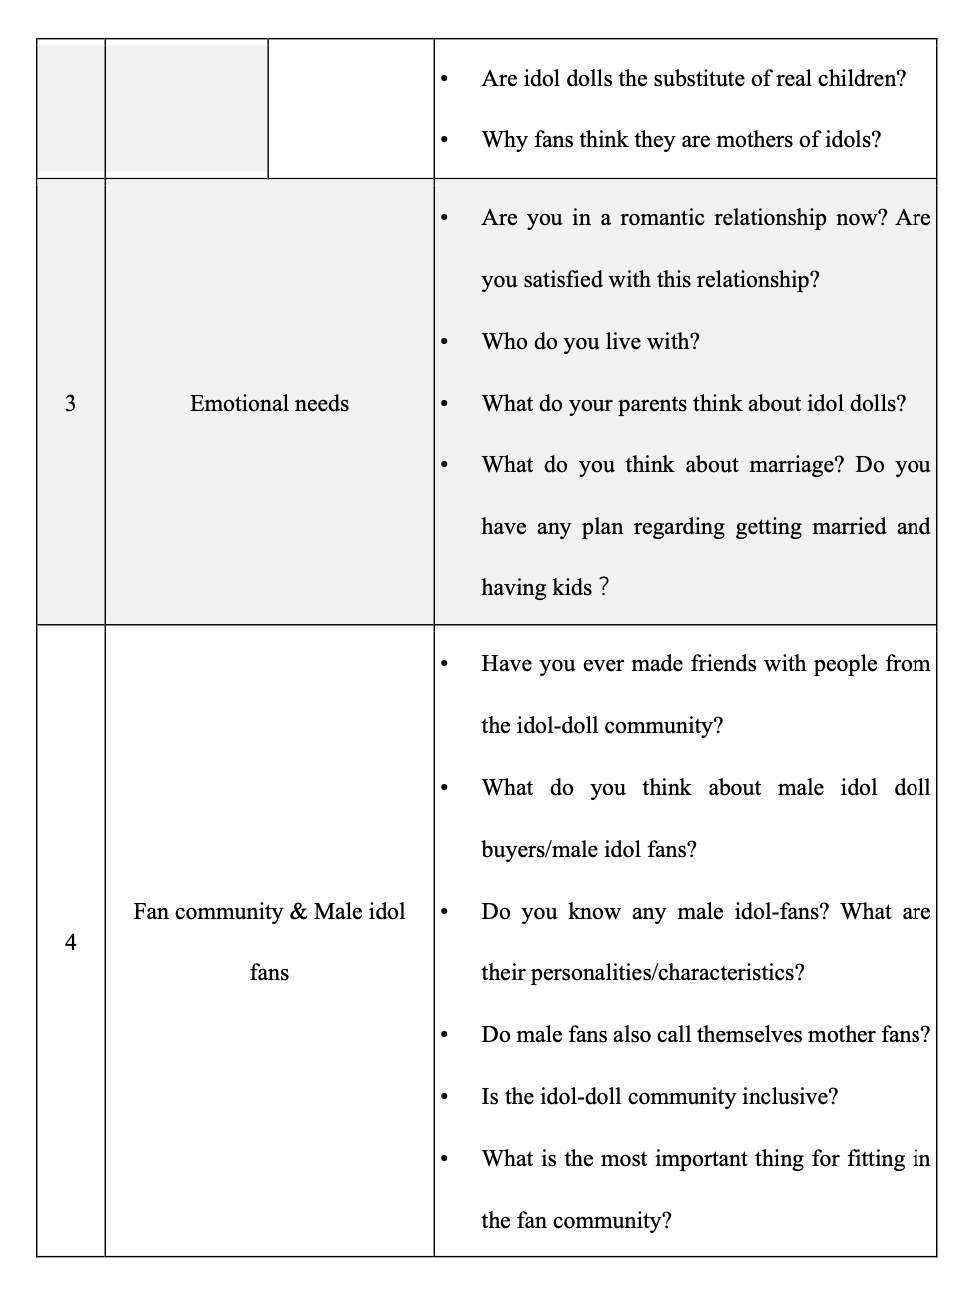


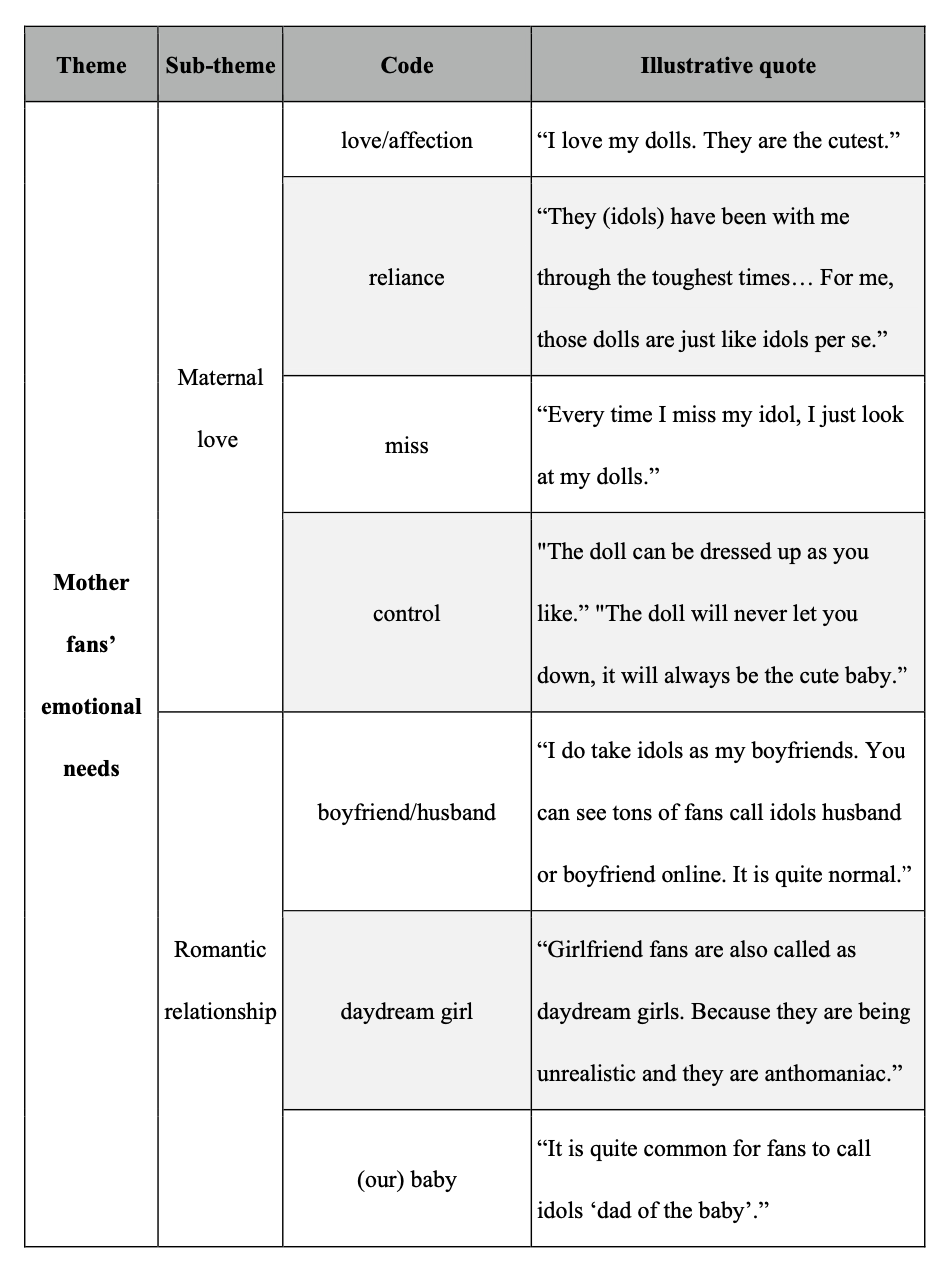
**Appendix C Thematic Analysis Grid (Interviews)**


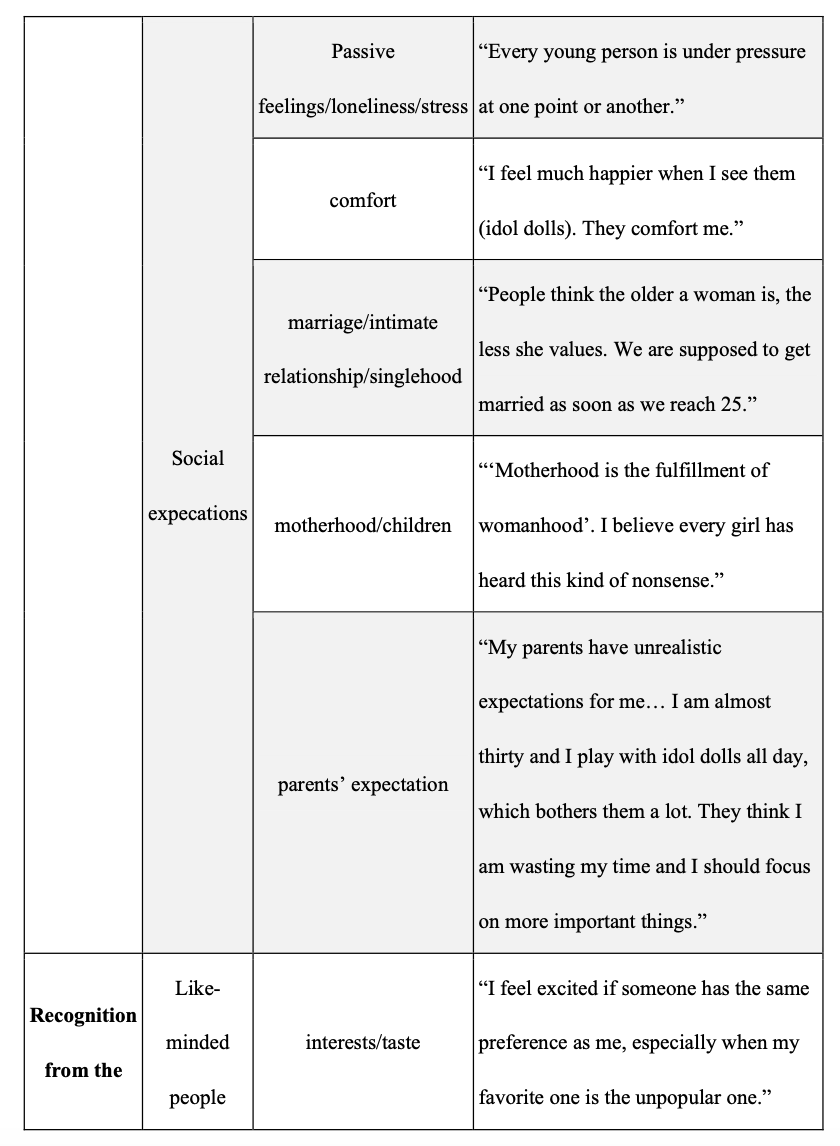


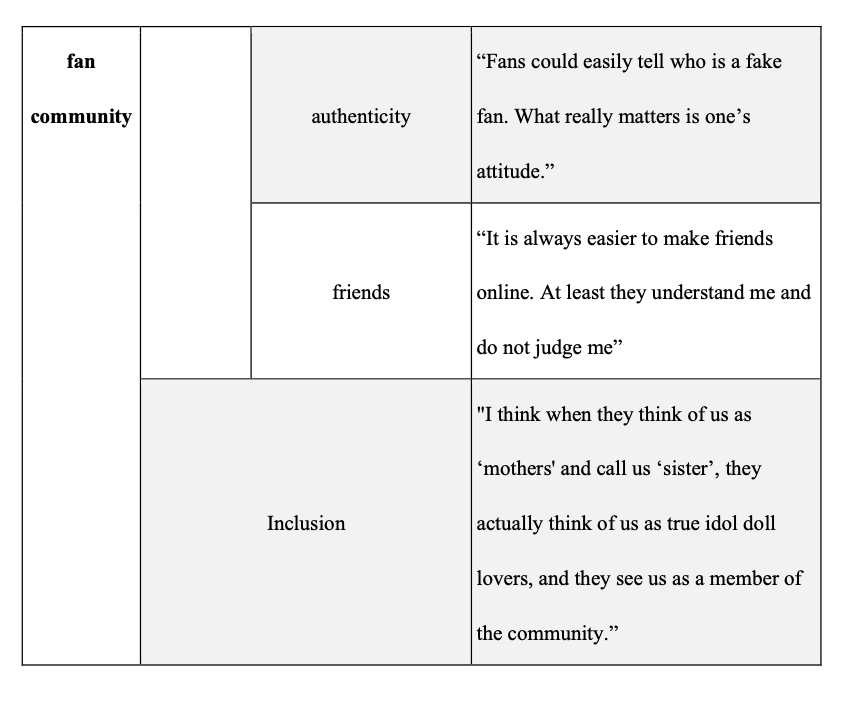


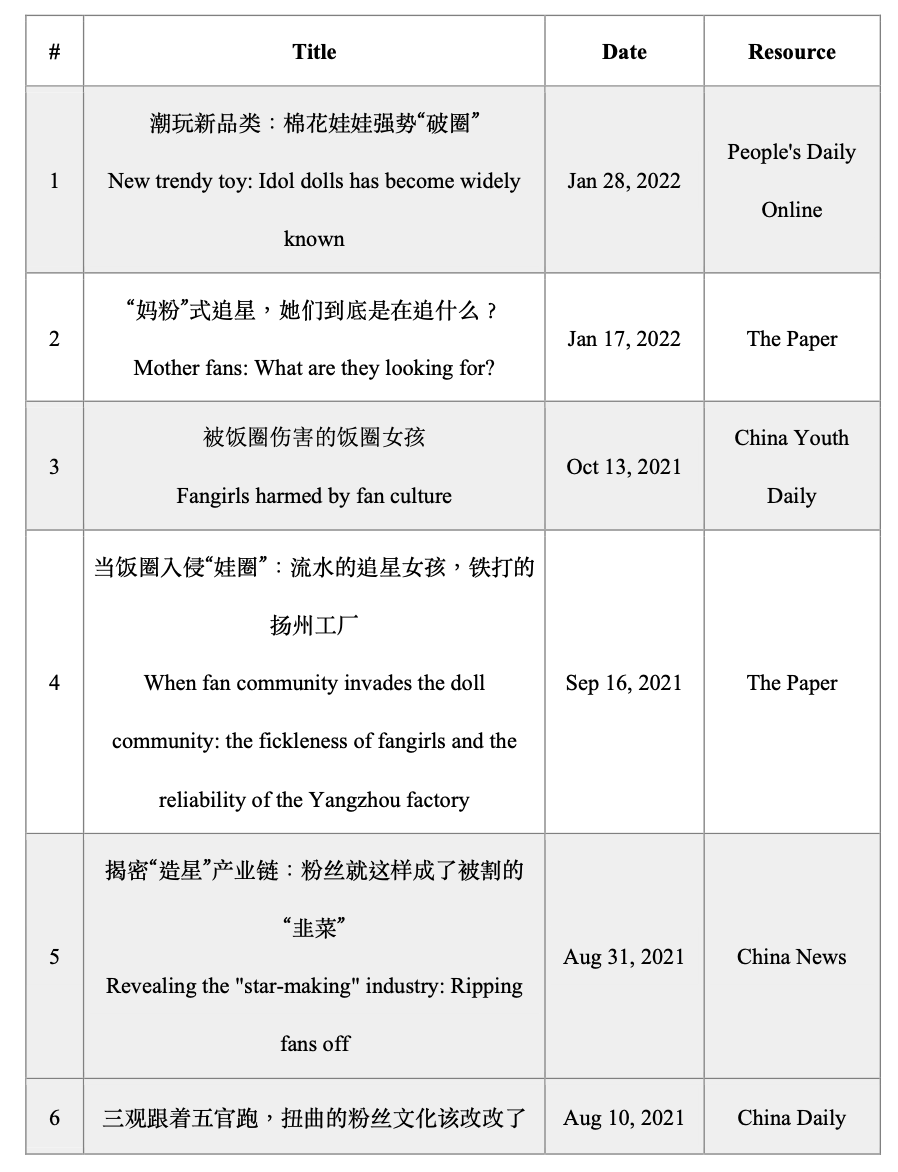
**Appendix D: Articles Used for Textual Analysis**


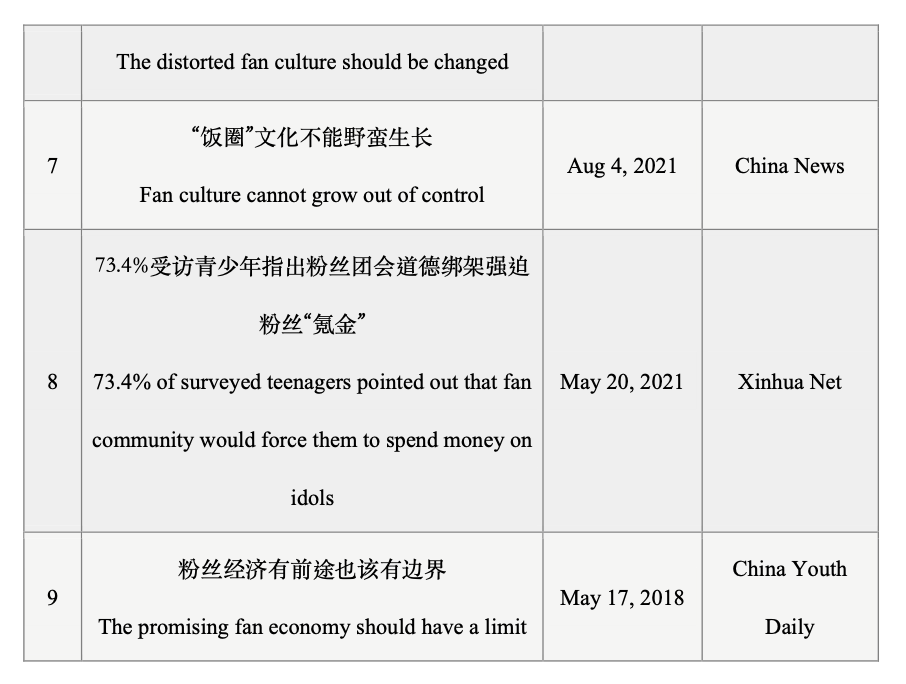


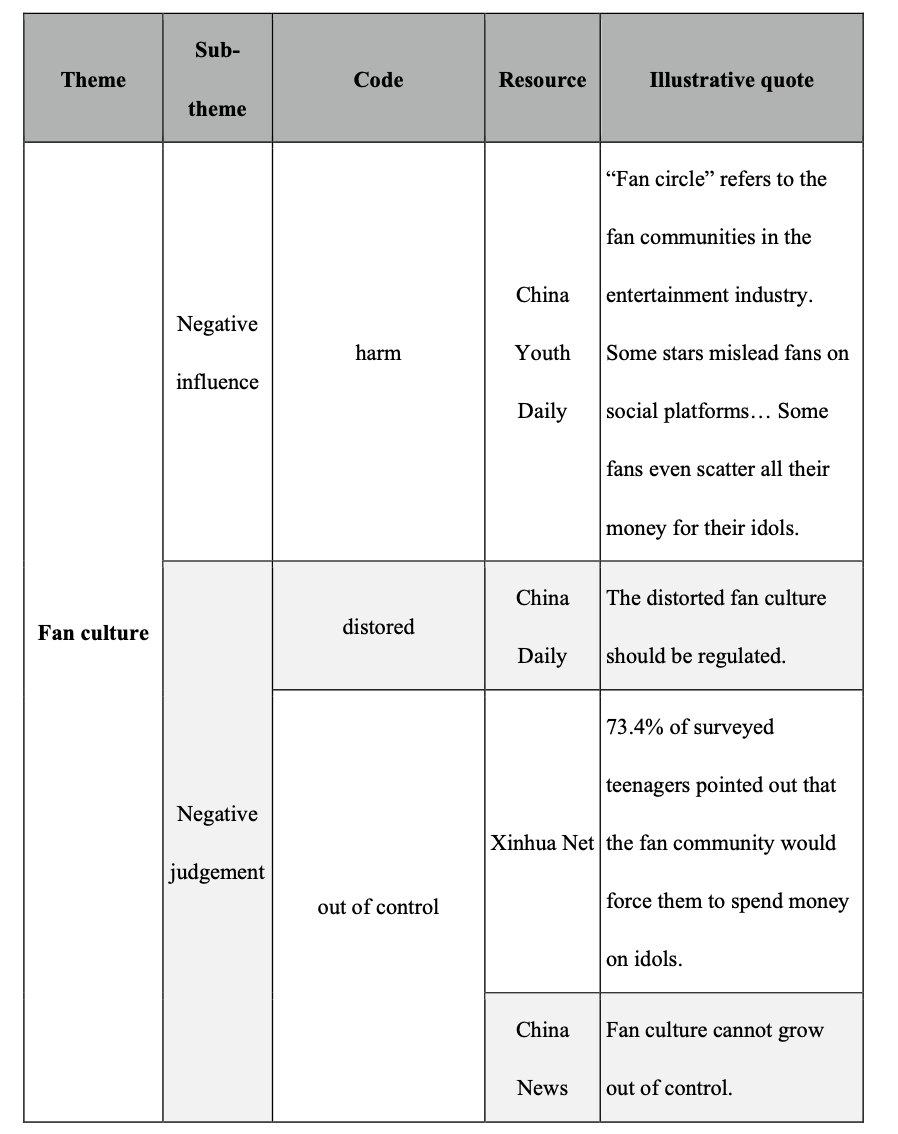
**Appendix E: Thematic Analysis Grid (News Articles)**


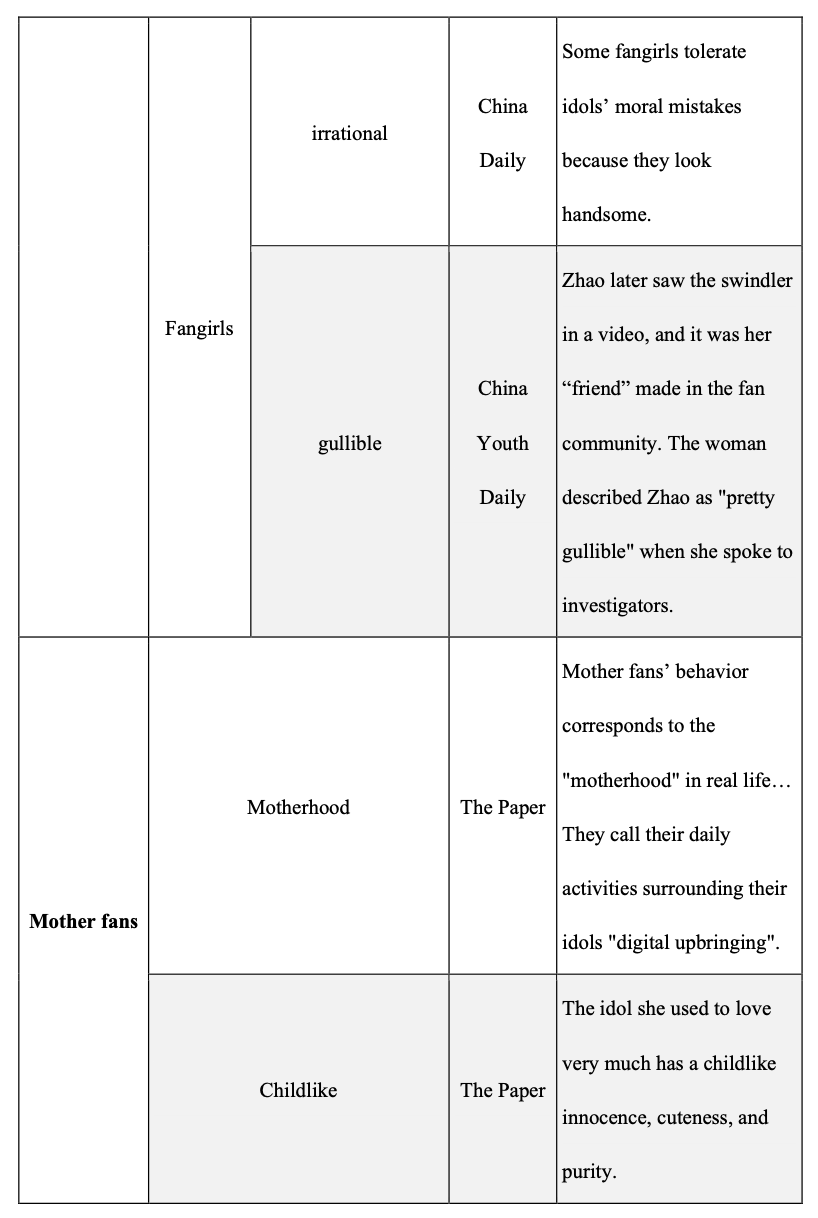


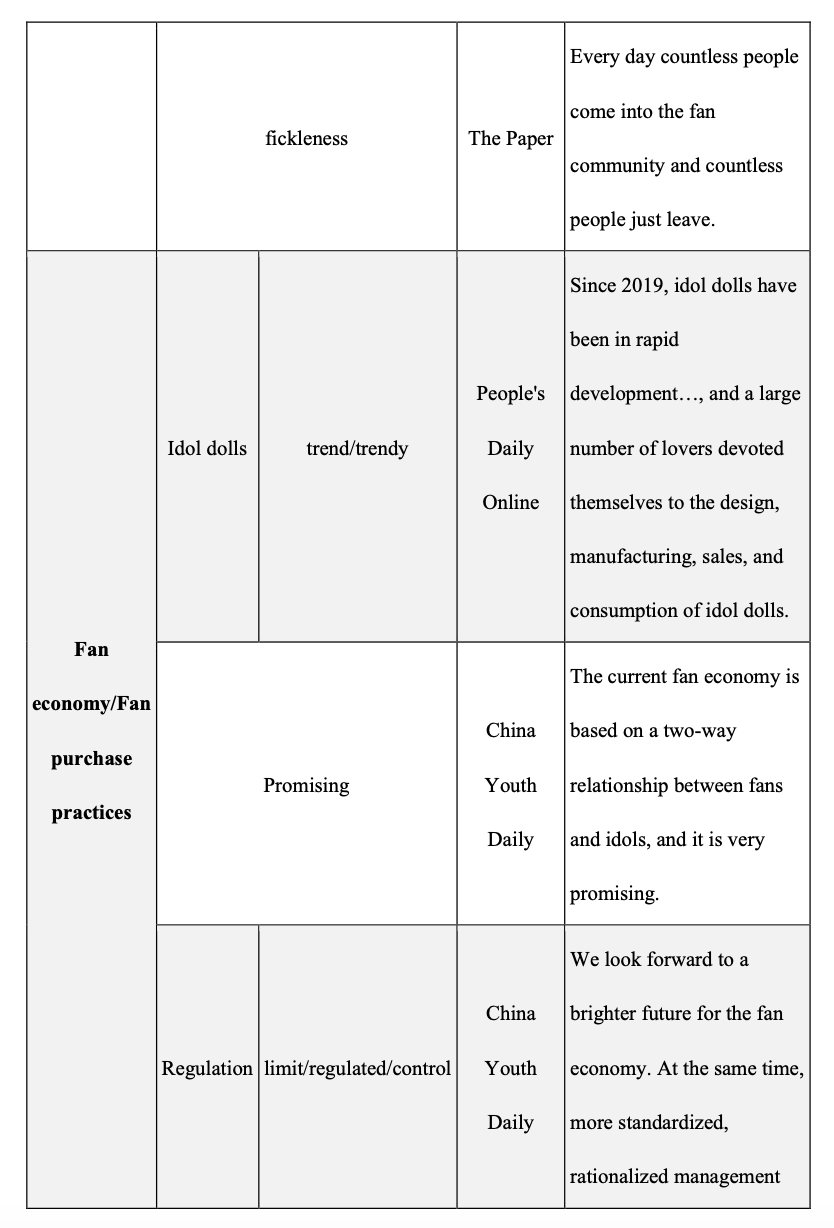


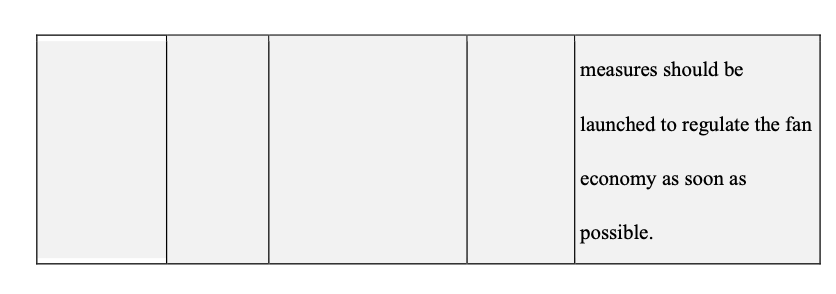

Supplement: Supplementary file 2 [file j_omgc-2023-0019_suppl_001.docx]
